# Supplementary material for: Leveraging Endogenous ADAR for Programmable Editing on RNA
Source: bioRxiv or medRxiv preprint supplement (doi:10.1101/605972), 2019-04-19
Supplement: Supplementary file [file media-1.pdf]

# Supplementary Materials

## **Leveraging Endogenous ADAR for Programmable Editing on RNA**

Liang Qu, Zongyi Yi, Shiyu Zhu, Chunhui Wang, Zhongzheng Cao, Zhuo Zhou,  
Pengfei Yuan, Ying Yu, Feng Tian, Zhiheng Liu, Ying Bao, Yanxia Zhao, Wensheng  
Wei†

†Correspondence should be addressed to W.W. ([wswei@pku.edu.cn](mailto:wswei@pku.edu.cn))

## Extended Data Figure Legends

### Extended Data Figure 1 | Exploration of an efficient RNA editing platform. **a**,

Schematic of dLbuCas13a-ADAR1<sub>DD</sub> (E1008Q) fusion protein and the corresponding crRNA. The catalytic inactive LbuCas13a was fused to the deaminase domain of ADAR1 (hyperactive E1008Q variant) using 3× GGGGS linker. The crRNA (crRNA<sup>Cas13a</sup>) consisted of Lbu-crRNA scaffold and a spacer which was complementary to the targeting RNA with an A-C mismatch as indicated. **b**, Schematic of dual fluorescent reporter system and the Lbu-crRNA with various lengths of spacers as indicated. **c**, Quantification of the EGFP positive (EGFP<sup>+</sup>) cells. HEK293T cells stably expressing the Reporter-1 were transfected with indicated lengths of crRNA<sup>Cas13a</sup>, with or without co-expression of the dLbuCas13a-ADAR1<sub>DD</sub> (E1008Q), followed by FACS analysis. Data are presented as the mean ± s.e.m. (n = 3). **d**, Representative FACS result from the experiment performed with the control (Ctrl crRNA<sub>70</sub>) or the targeting spacer (crRNA<sub>70</sub>).

### Extended Data Figure 2 | mRNA expression level of ADAR1/ADAR2 and

**arRNA-mediated RNA editing. a**, Quantitative PCR showing the mRNA levels of *ADAR1* and *ADAR2* in HEK293T cells. Data are presented as the mean ± s.e.m. (n = 3). **b**, Representative FACS results from Fig. 1e.

**Extended Data Figure 3 | Quantitative PCR showing the effects of LEAPER on the expression levels of targeted Reporter-1 transcripts by 111-nt arRNA or control RNA in HEK293T cells.** Data are presented as the mean ± s.e.m. (n = 3); unpaired two-sided Student's *t*-test, ns, not significant.

**Extended Data Figure 4 | Schematic of Reporter-1 (a), -2 (b), and -3 (c), as well as their corresponding arRNAs.**

**Extended Data Figure 5 | Effects of LEAPER on the expression levels of targeted transcripts and protein products.** **a**, Quantitative PCR showing the expression levels of targeted transcripts from PPIB, KRAS, SMAD4 and FANCC by the corresponding 151-nt arRNA or Control RNA in HEK293T cells. Data are presented as the mean  $\pm$  s.e.m. (n = 3); unpaired two-sided Student's *t*-test, \**P* < 0.05; \*\**P* < 0.01; \*\*\**P* < 0.001; \*\*\*\**P* < 0.0001; ns, not significant. **b**, Western blot results showing the effects on protein products of targeted KRAS gene by 151-nt arRNA in HEK293T cells.  $\beta$ -tubulin was used as a loading control.

**Extended Data Figure 6 | Editing endogenous transcripts with LEAPER.** **a**, Schematic of the *KARS* transcript sequence covered by the 151-nt arRNA. The arrow indicates the targeting adenosine. All adenosines were marked in red. **b**, Heatmap of editing rate on adenosines covered by indicated arRNAs in the *KARS* transcript (marked in the bold frame in blue). **c**, Schematic of the *SMAD4* transcript covered by the 151-nt arRNA. **d**, Heatmap of editing rate on adenosines covered by indicated arRNAs in the *SMAD4* transcript. **e**, Schematic of the *FANCC* transcript covered by the 151-nt arRNA. **f**, Heatmap of editing rate on adenosines covered by indicated arRNAs in the *FANCC* transcript. For each arRNA, the region of duplex RNA is highlighted with bold frame in blue. Data (**b**, **d**, and **f**) are presented as the mean (n = 3).

**Extended Data Figure 7 | Evaluation of potential off-targets.** **a**, Schematic of the highly complementary region of arRNA<sub>111</sub>-FANCC and the indicated potential off-target sequence, which were predicted by searching homologous sequences through NCBI-BLAST. **b**, Deep sequencing showing the editing rate on the on-target site and all predicted off-target sites of arRNA<sub>111</sub>-FANCC. All data are presented as the mean  $\pm$  s.e.m. (n = 3).

**Extended Data Figure 8 | Editing mutant *TP53*<sup>W53X</sup> transcripts by LEAPER.** Top, schematic of the *TP53* transcript sequence covered by the 111-nt arRNAs. The

arrow indicates the targeted adenosine. All adenosines were marked in red. Bottom, a heatmap of editing rate on adenosines covered by indicated arRNAs in the *TP53* transcript.

**Extended Data Figure 9 | Schematic representation of the selected disease-relevant cDNA containing G to A mutation from ClinVar data and the corresponding 111-nt arRNA.**

## **Supplementary Tables**

**Supplementary Table 1 | LbuCas13 crRNA sequences.**

**Supplementary Table 2 | Sequences of arRNAs and control RNAs used in this study.**

**Supplementary Table 3 | Disease-relevant cDNAs used in this study.**

**Supplementary Table 4 | Primers used in this study.**

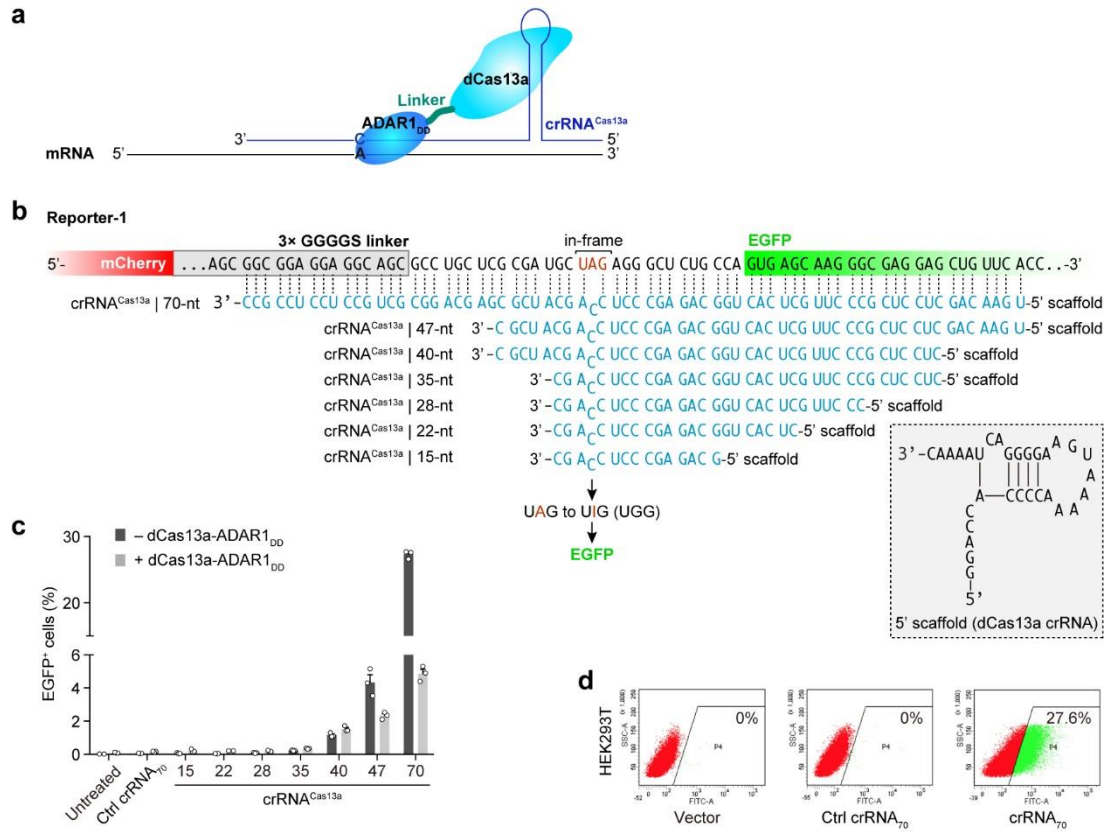

Extended Data Figure 1

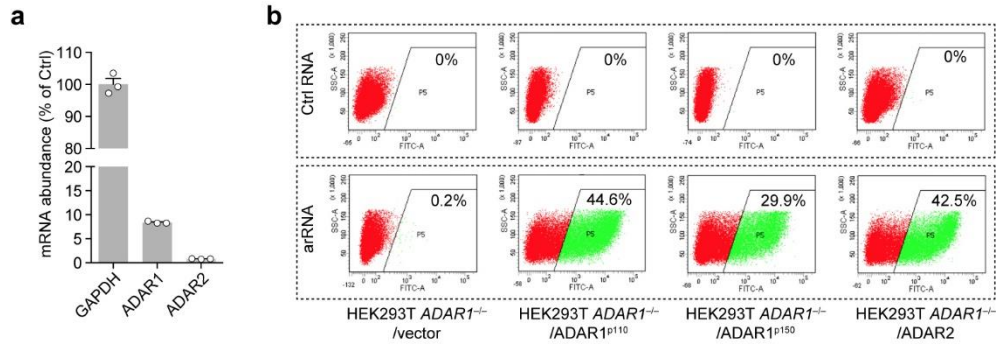

Extended Data Figure 2

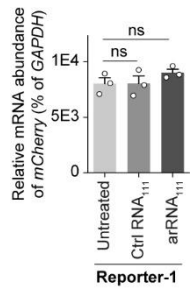

Extended Data Figure 3



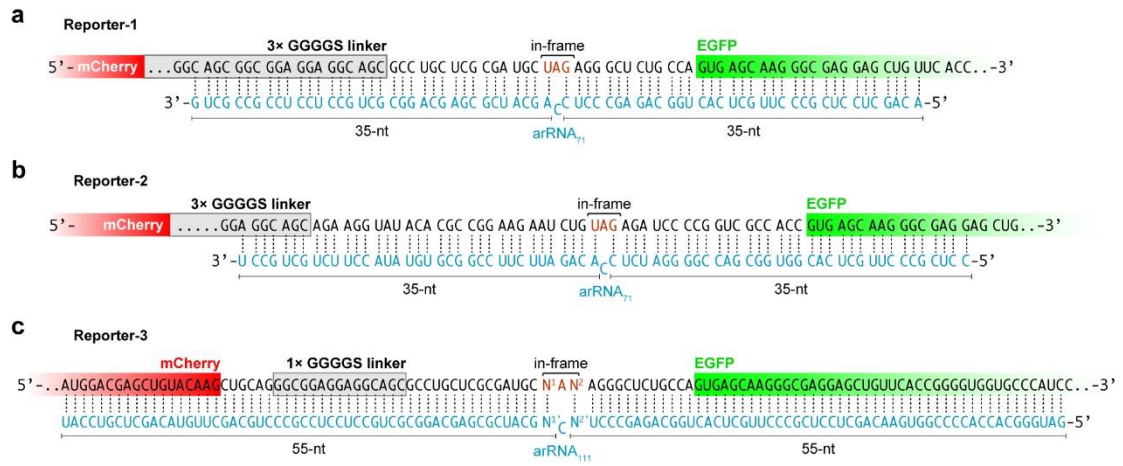

Extended Data Figure 4

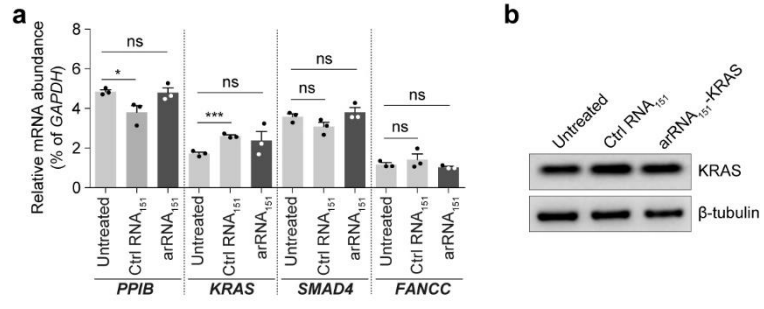

Extended Data Figure 5

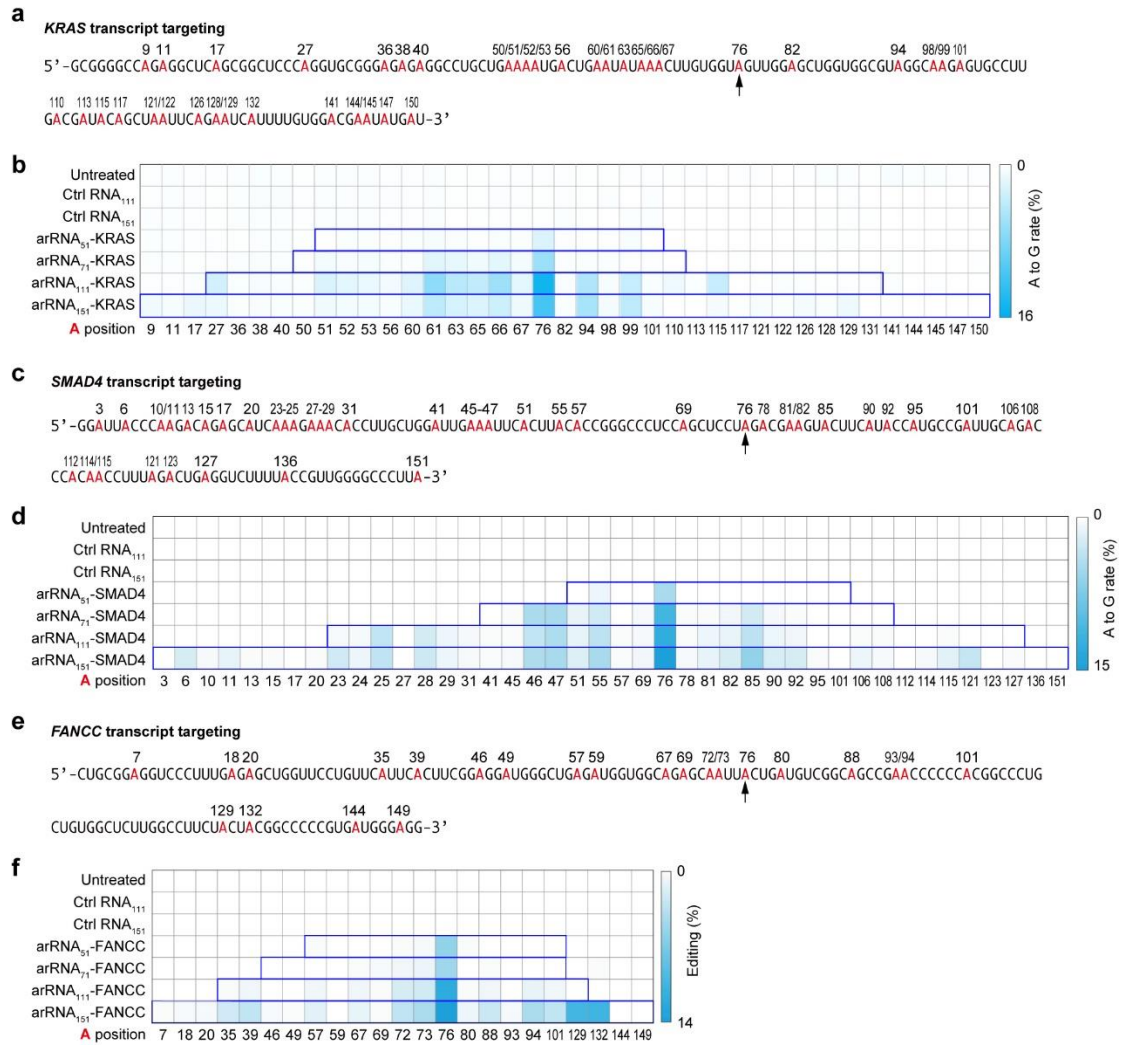

Extended Data Figure 6

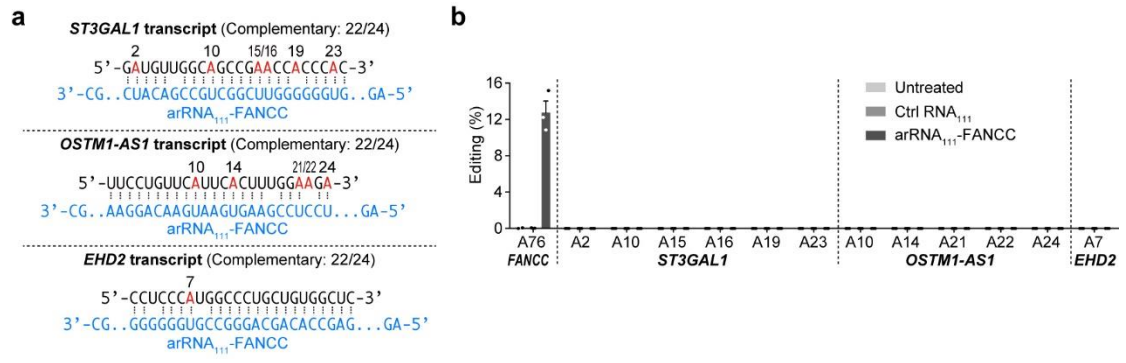

Extended Data Figure 7

**p53<sup>W53X</sup> transcript targeting**

5' -UUGCCGUCCCAAGCAAUGGAUGAUUUUGAUGCUGUCCCGGACGAAUUAUGAACAAUAGUUCACUGAAGACCCAGGUCCAGAUAGAUAGCUCCAGAAUGCCAGAGGCUGCUCC-3'

arRNA<sub>111</sub>-AG1: A (46)  
 arRNA<sub>111</sub>-AG4: A (16, 46, 91, 94)

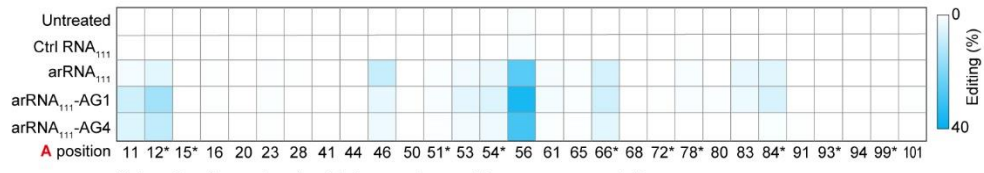

\*Adenosine sites undergoing A-to-I conversion result in synonymous mutations.

**Extended Data Figure 8**

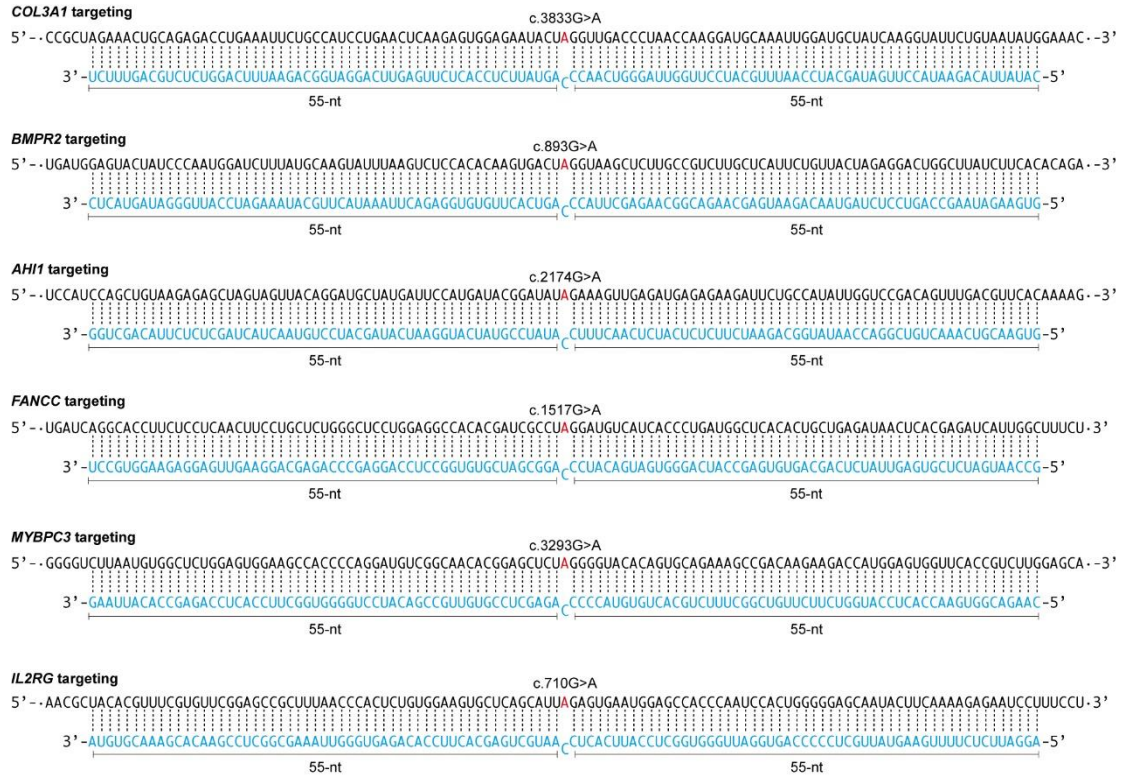

Extended Data Figure 9

## Supplementary sequences

### Reporter-1:

5'     3'

5'-

ATGGTGAGCAAGGGCGAGGAGGATAACATGGCCATCATCAAGGAGTTCAT  
GCGTTCAAGGTGCACATGGAGGGCTCCGTGAACGGCCACGAGTTCGAGA  
TCGAGGGCGAGGGCGAGGGCCGCCCTACGAGGGCACCCAGACCGCCAA  
GCTGAAGGTGACCAAGGGTGGCCCCCTGCCCTTCGCCTGGGACATCCTGT  
CCCCTCAGTTCATGTACGGCTCCAAGGCCTACGTGAAGCACCCCGCCGACA  
TCCCCGACTACTTGAAGCTGTCCTTCCCCGAGGGCTTCAAGTGGGAGCGCG  
TGATGAACTTCGAGGACGGCGGCGTGGTGACCGTGACCCAGGACTCCTCC  
CTGCAGGACGGCGAGTTCATCTACAAGGTGAAGCTGCGCGGCACCAACTT  
CCCCTCCGACGGCCCCGTAATGCAGAAGAAGACCATGGGCTGGGAGGCCT  
CCTCCGAGCGGATGTACCCCGAGGACGGCGCCCTGAAGGGCGAGATCAAG  
CAGAGGCTGAAGCTGAAGGACGGCGGCCACTACGACGCTGAGGTCAAGA  
CCACCTACAAGGCCAAGAAGCCCGTGCAGCTGCCCGGCGCCTACAACGTC  
AACATCAAGTTGGACATCACCTCCCACAACGAGGACTACACCATCGTGGA  
ACAGTACGAACGCGCCGAGGGCCGCACTCCACCGGCGGCATGGACGAGC  
TGTAACAAG CTGCAG GGCGGAGGAGGCAGC GGCGGAGGAGGCAGC  
GGCGGAGGAGGCAGC GCCTGCTCGCGATGCTAGAGGGCTCTGCCA  
GTGAGCAAGGGCGAGGAGCTGTTACCGGGGTGGTGCCATCCTGGTCTGA  
GCTGGACGGCGACGTAAACGGCCACAAGTTCAGCGTGTCCGGCGAGGGCG  
AGGGCGATGCCACCTACGGCAAGCTGACCCTGAAGTTCATCTGCACCACC  
GGCAAGCTGCCCGTGCCCTGGCCCACCCTCGTGACCACCCTGACCTACGG  
CGTGACGTGCTTCAGCCGCTACCCCGACCACATGAAGCAGCACGACTTCTT  
CAAGTCCGCCATGCCCGAAGGCTACGTCCAGGAGCGCACCATCTTCTTCAA  
GGACGACGGCAACTACAAGACCCGCGCCGAGGTGAAGTTCGAGGGGCGAC  
ACCCTGGTGAACCGCATCGAGCTGAAGGGCATCGACTTCAAGGAGGACGG  
CAACATCCTGGGGCACAAGCTGGAGTACAACACTACAACAGCCACAACGTCT  
ATATCATGGCCGACAAGCAGAAGAACGGCATCAAGGTGAACTTCAAGATC  
CGCCACAACATCGAGGACGGCAGCGTGCAGCTCGCCGACCACTACCAGCA  
GAACACCCCATCGGCGACGGCCCCGTGCTGCTGCCCGACAACCACTACC  
TGAGCACCCAGTCCGCCCTGAGCAAAGACCCCAACGAGAAGCGCGATCAC  
ATGGTCTGCTGGAGTTCGTGACCGCCGCCGGGATCACTCTCGGCATGGAC  
GAGCTGTACAAGTAA-3'

### Reporter-2:

5'     3'

5'-

ATGGTGAGCAAGGGCGAGGAGGATAACATGGCCATCATCAAGGAGTTCAT  
GCGTTCAAGGTGCACATGGAGGGCTCCGTGAACGGCCACGAGTTCGAGA  
TCGAGGGCGAGGGCGAGGGCCGCCCTACGAGGGCACCCAGACCGCCAA

GCTGAAGGTGACCAAGGGTGGCCCCCTGCCCTTCGCCTGGGACATCCTGT  
CCCCTCAGTTCATGTACGGCTCCAAGGCCTACGTGAAGCACCCCGCCGACA  
TCCCCGACTACTTGAAGCTGTCCTTCCCCGAGGGCTTCAAGTGGGAGCGCG  
TGATGAACTTCGAGGACGGCGGCCTGGTGACCGTGACCCAGGACTCCTCC  
CTGCAGGACGGCGAGTTCATCTACAAGGTGAAGCTGCGCGGCACCAACTT  
CCCCTCCGACGGCCCCGTAATGCAGAAGAAGACCATGGGGCTGGGAGGCCT  
CCTCCGAGCGGATGTACCCCGAGGACGGCGCCCTGAAGGGCGAGATCAAG  
CAGAGGCTGAAGCTGAAGGACGGCGGCCACTACGACGCTGAGGTCAAGA  
CCACCTACAAGGCCAAGAAGCCCGTGCAGCTGCCCGGCGCCTACAACGTC  
AACATCAAGTTGACATCACCTCCCACAACGAGGACTACACCATCGTGGA  
ACAGTACGAACGCGCCGAGGGCCGCCACTCCACCGGCGGCATGGACGAGC  
TGTACAAG CTGCAG GGCGGAGGAGGCAGC GGCGGAGGAGGCAGC  
GGCGGAGGAGGCAGC

AGAAGGTATACACGCCGGAAGAATCTGTAGAGATCCCCGGTCGCCACC  
GTGAGCAAGGGCGAGGAGCTGTTACCCGGGTGGTGCCATCCTGGTCGA  
GCTGGACGGCGACGTAAACGGCCACAAGTTCAGCGTGTCCGGCGAGGGCG  
AGGGCGATGCCACCTACGGCAAGCTGACCCTGAAGTTCATCTGCACCACC  
GGCAAGCTGCCCGTGCCCTGGCCCACCCTCGTGACCACCCTGACCTACGG  
CGTGCAGTGCTTCAGCCGCTACCCCGACCACATGAAGCAGCACGACTTCTT  
CAAGTCCGCCATGCCCGAAGGCTACGTCCAGGAGCGCACCATCTTCTTCAA  
GGACGACGGCAACTACAAGACCCGCGCCGAGGTGAAGTTCGAGGGGCGAC  
ACCCTGGTGAACCGCATCGAGCTGAAGGGCATCGACTTCAAGGAGGACGG  
CAACATCCTGGGGCACAAGCTGGAGTACAACACTACAACAGCCACAACGTCT  
ATATCATGGCCGACAAGCAGAAGAACGGCATCAAGGTGAACTTCAAGATC  
CGCCACAACATCGAGGACGGCAGCGTGACGCTCGCCGACCACTACCAGCA  
GAACACCCCATCGGCGACGGCCCCGTGCTGCTGCCCGACAACCCTACC  
TGAGCACCCAGTCCGCCCTGAGCAAAGACCCCAACGAGAAGCGCGATCAC  
ATGGTCTGCTGGAGTTCGTGACCGCCGCCGGGATCACTCTCGGCATGGAC  
GAGCTGTACAAGTAA-3'

### Reporter-3:

5' mCherry Linker Target eGFP 3'

5'-

ATGGTGAGCAAGGGCGAGGAGGATAACATGGCCATCATCAAGGAGTTCAT  
GCGCTTCAAGGTGCACATGGAGGGCTCCGTGAACGGCCACGAGTTCGAGA  
TCGAGGGCGAGGGCGAGGGCCGCCCTACGAGGGCACCCAGACCGCAA  
GCTGAAGGTGACCAAGGGTGGCCCCCTGCCCTTCGCCTGGGACATCCTGT  
CCCCTCAGTTCATGTACGGCTCCAAGGCCTACGTGAAGCACCCCGCCGACA  
TCCCCGACTACTTGAAGCTGTCCTTCCCCGAGGGCTTCAAGTGGGAGCGCG  
TGATGAACTTCGAGGACGGCGGCCTGGTGACCGTGACCCAGGACTCCTCC  
CTGCAGGACGGCGAGTTCATCTACAAGGTGAAGCTGCGCGGCACCAACTT  
CCCCTCCGACGGCCCCGTAATGCAGAAGAAGACCATGGGGCTGGGAGGCCT  
CCTCCGAGCGGATGTACCCCGAGGACGGCGCCCTGAAGGGCGAGATCAAG



CAGAGGCTGAAGCTGAAGGACGGCGGCCACTACGACGCTGAGGTCAAGA  
 CCACCTACAAGGCCAAGAAGCCCGTGCAGCTGCCCGGCGCCTACAACGTC  
 AACATCAAGTTGGACATCACCTCCCACAACGAGGACTACACCATCGTGGA  
 ACAGTACGAACGCGCCGAGGGCCGCCACTCCACCGGCGGCATGGACGAGC  
 TGTACAAG                      CTGCAG                      GGCGGAGGAGGCAGC  
 GCCTGCTCGCGATGCTAGAGGGCTCTGCCA  
 GTGAGCAAGGGCGAGGAGCTGTTACCGGGGTGGTGCCCATCCTGGTCTGA  
 GCTGGACGGCGACGTAAACGGCCACAAGTTCAGCGTGTCCGGCGAGGGCG  
 AGGGCGATGCCACCTACGGCAAGCTGACCCTGAAGTTCATCTGCACCACC  
 GGCAAGCTGCCCGTGCCCTGGCCACCCTCGTGACCACCCTGACCTACGG  
 CGTGCAGTGCTTCAGCCGCTACCCCGACCACATGAAGCAGCAGACTTCTT  
 CAAGTCCGCCATGCCCCGAAGGCTACGTCCAGGAGCGCACCATCTTCTTCAA  
 GGACGACGGCAACTACAAGACCCGCGCCGAGGTGAAGTTCGAGGGGCGAC  
 ACCCTGGTGAACCGCATCGAGCTGAAGGGCATCGACTTCAAGGAGGACGG  
 CAACATCCTGGGGCACAAGCTGGAGTACAACACTACAACAGCCACAACGTCT  
 ATATCATGGCCGACAAGCAGAAGAACGGCATCAAGGTGAACCTTCAAGATC  
 CGCCACAACATCGAGGACGGCAGCGTGCAGCTCGCCGACCACTACCAGCA  
 GAACACCCCATCGGCGACGGCCCCGTGCTGCTGCCCGACAACCACTACC  
 TGAGCACCCAGTCCGCCCTGAGCAAAGACCCCAACGAGAAGCGCGATCAC  
 ATGGTCTGCTGGAGTTCGTGACCGCCGCCGGGATCACTCTCGGCATGGAC  
 GAGCTGTACAAGTAA-3'

**pLenti-dCas13-ADAR1<sub>DD</sub>**

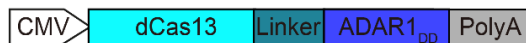

5'-ATGGTG GATTACAAGGATGACGACGATAAG(Flag tag)  
 ATGAAAGTGACGAAGGTAGGAGGCATTTTCGCATAAGAAGTACACGTCCGA  
 AGGCCGCTTAGTGAAGTCAGAATCGGAAGAAAATCGCACAGACGAACGTC  
 TGTCGGCGTTGCTTAATATGCGCCTTGACATGTATATCAAGAATCCCAGCAG  
 CACGGAAACCAAGGAAAATCAAAAACGCATTGGGAAATTAAGAAATTCT  
 TCTCAAACAAAATGGTCTATCTTAAAGACAATACCTTGAGTTTGAAGAATG  
 GGAAAAGGAGAACATTGATCGTGAGTATTCTGAGACTGACATCCTTGAGA  
 GCGATGTCCGTGACAAGAAAACTTCGCCGTGTTGAAAAGATCTATCTGA  
 ATGAAAACGTGAACTCGGAGGAATTGGAAGTTTTTCGTAACGACATTAAGA  
 AGAAACTGAACAAAATCAACAGCCTGAAGTACTCATTGAAAAGAATAAG  
 GCGAATTATCAAAAAGATTAATGAGAATAACATCGAGAAGGTTGAAGGTAAG  
 TCAAAGCGTAACATTATTTACGATTATTATCGTGAGTCAGCGAAACGTGACG  
 CTTATGTAAGCAATGTGAAAGAAGCCTTTGATAAGCTTTACAAGGAAGAGG  
 ACATTGCAAACTTGTTCTTGA AATTGAGAACCTTACGAAGTTAGAGAAAT  
 ACAAGATTCGCGAGTTCTACCACGAAATTATTGGACGTAAGAATGACAAGG  
 AAAACTTTGCAAAAATCATCTACGAAGAAATCCAGAATGTTAATAACATGA  
 AAGAGTTGATCGAGAAGGTACCGGACATGAGTGAGTTGAAAAGAGCCAA  
 GTATTTTACAAGTATTACTTAGACAAAAGAAGAGTTGAACGACAAGAACATC  
 AAATACGCGTTTTTGTTCATTTTCGTGGAATCGAAATGAGTCAGTTGCTGAAG

AACTACGTATATAAGCGCTTAAGTAATATCTCGAATGACAAAATTAAGCGTA  
TCTTTGAATACCAGAACTTGAAAAAATTGATCGAAAATAAGCTGTAAACA  
AACTTGACACGTACGTCCGTAATTGTGGAAAGTATAATTATTATTGCAAGA  
CGGCGAAATTGCCACTTCAGATTTTCATCGCCCGCAACCGTCAGAATGAAGC  
GTTTCTTCGCAACATCATTGGGGTGTTCATCTGTGGCCTACTTTTCTCTTCGC  
AACATTCTTGAAACGGGAGAACGAGAATGATATTACTGGGCGTATGCGCGGC  
AAAACAGTTAAGAACAATAAAGGTGAAGAGAAGTACGTGTCCGGAGAAGT  
TGATAAGATCTATAATGAAAATAAGAAGAACGAGGTTAAGGAGAACTTAAA  
AATGTTCTATTTCGTACGATTTCAATATGGACAACAAGAATGAAATCGAAGAT  
TTCTTCGCCAACATCGACGAGGCGATTTCTTCCATCGCTCACGGTATTGTCG  
CCTTCAACTTGGAATTAGAAGGTAAGGATATCTTTGCGTTCAAGAACATTGC  
GCCATCCGAAATCTCAAAGAAGATGTTTCAGAATGAGATTAACGAGAAAA  
AACTGAAATTGAAGATCTTTCGTCAACTGAACTCTGCCAACGTGTTCCGCT  
ATCTCGAAAAGTATAAAATTCTGAATTACCTTAAACGTACACGCTTCGAGTT  
TGTCATAAAAATATCCCATTCGTCCCGTCTTTCACCAAATTATATTCGCGCA  
TTGATGACCTGAAGAATAGTCTTGGGATTTACTGGAAAACCTCCGAAAACAA  
ACGACGACAATAAGACTAAGGAGATTATTGATGCCCAAATCTATTTGCTTAA  
AAACATCTATTACGGGGAGTTTCTGAATTATTTTCATGTGCAACAATGGTAAT  
TTCTTTGAGATTTCTAAAGAAATCATCGAATTGAACAAGAACGATAAACGC  
AACTTAAAGACTGGGTTTTACAAGCTGCAAAAAGTTTGAAGACATCCAGGA  
GAAGATTCCAAAGGAATACTTGGCGAATATCCAGTCCCTGTACATGATTAAT  
GCCGGTAATCAGGACGAAGAAGAAAAGGACACTTATATTGATTTTATTCAA  
AAGATCTTCTTAAAGGGATTTATGACGTATCTTGCTAATAACGGTCGTTTAA  
GTCTGATTTACATCGGCTCGGATGAAGAAACAAATACGTCATTAGCAGAAA  
AGAAGCAAGAGTTTGACAAGTTCTTGAAGAAGTACGAGCAGAACAATAAT  
ATCAAGATCCCCTATGAGATCAATGAATTCCTGCGTGAGATCAAACCTGGGA  
AACATCCTGAAGTATACTGAGCGTTTAAACATGTTCTACCTTATCTTAAAGC  
TTTTGAATCACAAGGAGCTGACAAATCTGAAGGGTAGTCTTGAAAAATATC  
AGTCTGCCAATAAGGAAGAAGCGTTCTCTGACCAATTGGAGTTAATTAACC  
TGCTTAACCTTGACAACAACCGCGTGACGGAAGACTTCGAATTAGAGGCC  
GACGAGATTGGAAAATTTCTTGATTTCAATGGCAACAAGTTAAGGATAAC  
AAGGAACTGAAAAAGTTTCGATACAAACAAGATCTACTTTGACGGCGAGAA  
CATTATCAAACACCGTGCCCTTCTACAATATTAAGAAATATGGCATGTAAAC  
TACTGGAGAAAATTGCCGACAAGGCTGGATACAAGATCTCGATCGAAGA  
GCTGAAGAAATACTCCAATAAAAAGAATGAGATCGAGAAGAACCATAAGA  
TGCAGGAAAATCTGCACCGCAAATACGCTCGTCCCCGTAAAGACGAGAAG  
TTACAGATGAGGACTATGAAAGTTACAAGCAAGCTATTGAGAATATTGAG  
GAGTACACCCACCTTAAGAACAAGGTAGAATTCAATGAGCTGAATTTACTG  
CAGGGCCTGTTGCTGCGCATTTTACATCGTTTAGTCGGATATACCTCAATTT  
GGGAACGCGATCTGCGCTTCCGCCTTAAAGGTGAGTTCCAGAAAACCAA  
TACATCGAAGAGATCTTCAACTTTGAAAATAAGAAGAACGTGAAGTACAA  
AGGGGGTCAGATTGTAGAGAAATACATTAAATTCTACAAGGAATTACATCA  
AAATGATGAAGTTAAGATCAACAAGTACAGTTCCGCGAATATCAAGGTGTT  
GAAGCAAGAAAAGAAGGACCTTTATATTGCTAATTACATCGCCGCATTCAAT

TATATTCCTCACGCCGAGATCTCACTGCTGGAAGTCCTTGAAAATTTGCGTA  
AATTGCTGTCCTACGATCGCAAATGAAAAATGCCGTAATGAAATCAGTAG  
TTGATATCCTTAAGGAGTATGGTTTTGTAGCCACATTCAAAATCGGGGCGGA  
CAAGAAGATCGGTATTCAGACACTGGAGAGCGAAAAAATCGTGCACTTA  
AGAATCTTAAGAAGAAGAAGTTAATGACTGACCGCAATTCCGAGGAACTTT  
GCAAATTGGTGAAGATTATGTTTGAATACAAAATGGAAGAGAAAAAGTCTG  
AAAAC GGC GCGCC A GGC GGAGGAGGCAGC GGC GGAGGAGGCAGC  
CTCCTCCTCTCAAGGTCCCCAGAAGCACAGCCAAAGACACTCCCTCTCACT  
GGCAGCACCTTCCATGACCAGATAGCCATGCTGAGCCACCGGTGCTTCAAC  
ACTCTGACTAACAGCTTCCAGCCCTCCTTGCTCGGCCGCAAGATTCTGGCC  
GCCATCATTATGAAAAAAGACTCTGAGGACATGGGTGTCGTCGTCAGCTTG  
GGAACAGGGAATCGCTGTGTAAGGAGATTCTCTCAGCCTAAAAGGAGA  
AACTGTCAATGACTGCCATGCAGAAATAATCTCCCGGAGAGGCTTCATCAG  
GTTTCTCTACAGTGAGTTAATGAAATACAACTCCAGACTGCGAAGGATAG  
TATATTTGAACCTGCTAAGGGAGGAGAAAAGCTCCAAATAAAAAAGACTGT  
GTCATTCCATCTGTATATCAGCACTGCTCCGTGTGGAGATGGCGCCCTCTTT  
GACAAGTCCTGCAGCGACCGTGCTATGGAAAGCACAGAATCCCGCCACTA  
CCCTGTCTTCGAGAATCCCAAACAAGGAAAGCTCCGCACCAAGGTGGAGA  
ACGGACAAGGCACAATCCCTGTGGAATCCAGTGACATTGTGCCTACGTGGG  
ATGGCATTCCGGCTCGGGGAGAGACTCCGTACCATGTCTGTAGTGACAAA  
TCCTACGCTGGAACGTGCTGGGCCTGCAAGGGGCACTGTTGACCCACTTCC  
TGCAGCCCATTATCTCAAATCTGTCACATTGGGTTACCTTTTCAGCCAAGG  
GCATCTGACCCGTGCTATTTGCTGTCGTGTGACAAGAGATGGGAGTGCAAT  
TGAGGATGGACTACGACATCCCTTTATTGTCAACCACCCCAAGGTTGGCAG  
AGTCAGCATATATGATTCCAAAAGGCAATCCGGGAAGACTAAGGAGACAA  
GCGTCAACTGGTGTCTGGCTGATGGCTATGACCTGGAGATCCTGGACGGTA  
CCAGAGGCACTGTGGATGGGCCACGGAATGAATTGTCCCGGGTCTCCAAA  
AAGAACATTTTTCTTCTATTTAAGAAGCTCTGCTCCTTCCGTTACCGCAGGG  
ATCTACTGAGACTCTCCTATGGTGAGGCCAAGAAAGCTGCCCGTGACTACG  
AGACGGCCAAGAACTACTTCAAAAAAGGCCTGAAGGATATGGGCTATGGG  
AACTGGATTAGCAAACCCAGGAGGAAAAGAACTTTTATCTCTGCCAGTA  
TAG-3'

#### **ADAR1(p110) cDNA**

5'-

ATGGCCGAGATCAAGGAGAAAATCTGCGACTATCTCTTCAATGTGTCTGAC  
TCCTCTGCCCTGAATTTGGCTAAAAATATTGGCCTTACCAAGGCCCGAGATA  
TAAATGCTGTGCTAATTGACATGGAAAGGCAGGGGGATGTCTATAGACAAG  
GGACAACCCCTCCCATATGGCATTGACAGACAAGAAGCGAGAGAGGATG  
CAATCAAGAGAAATACGAACAGTGTTCCCTGAAACCGCTCCAGCTGCAAT  
CCCTGAGACCAAAAAGAAACGCAGAGTTCCCTCACCTGTAATATACCCACATC  
AAATGCCTCAAATAACATGGTAACACAGAAAAAGTGGAGAATGGGCAGG  
AACCTGTCATAAAGTTAGAAAACAGGCAAGAGGCCAGACCAGAACCAGC  
AAGACTGAAACCACCTGTTTATTACAATGGCCCTCAAAGCAGGGTATGT

TGACTTTGAAAATGGCCAGTGGGCCACAGATGACATCCCAGATGACTTGAA  
TAGTATCCGCGCAGCACCAGGTGAGTTTCGAGCCATCATGGAGATGCCCTC  
CTTCTACAGTCATGGCTTGCCACGGTGTTCACCCTACAAGAACTGACAGA  
GTGCCAGCTGAAGAACCCCATCAGCGGGCTGTTAGAATATGCCCAGTTCGC  
TAGTCAAACCTGTGAGTTCAACATGATAGAGCAGAGTGGACCACCCCATGA  
ACCTCGATTTAAATTCCAGGTTGTTCATCAATGGCCGAGAGTTTCCCCCAGCT  
GAAGCTGGAAGCAAGAAAGTGGCCAAGCAGGATGCAGCTATGAAAGCCAT  
GACAATTCTGCTAGAGGAAGCCAAAGCCAAGGACAGTGGAAAATCAGAA  
GAATCATCCCCTATTCCACAGAGAAAGAATCAGAGAAGACTGCAGAGTC  
CCAGACCCCCACCCCTTCAGCCACATCCTTCTTTTCTGGGAAGAGCCCCGT  
CACCACACTGCTTGAGTGTATGCACAAATTGGGGAACTCCTGCGAATTCCG  
TCTCCTGTCCAAAGAAGGCCCTGCCCATGAACCCAAGTTCCAATACTGTGT  
TGCAGTGGGAGCCCAAACCTTCCCCAGTGTGAGTGTCCAGCAAGAAAG  
TGGCAAAGCAGATGGCCGCAGAGGAAGCCATGAAGGCCCTGCATGGGGA  
GGCGACCAACTCCATGGCTTCTGATAACCAGCCTGAAGGTATGATCTCAGA  
GTCACTTGATAACTTGGAATCCATGATGCCCAACAAGGTCAGGAAGATTGG  
CGAGCTCGTGAGATACCTGAACACCAACCCTGTGGGTGGCCTTTTGGAGTA  
CGCCCCGCTCCCATGGCTTTGCTGCTGAATTCAAGTTGGTTCGACCAGTCCGG  
ACCTCCTCACGAGCCCAAGTTCGTTTACCAAGCAAAAGTTGGGGGTGCT  
GGTTCCCAGCCGTCTGCGCACACAGCAAGAAGCAAGGCAAGCAGGAAGC  
AGCAGATGCGGCTCTCCGTGTCTTGATTGGGGAGAACGAGAAGGCAGAAC  
GCATGGGTTTTACAGAGGTAACCCCAAGTGCAGGGGCCAGTCTCAGAAGA  
ACTATGCTCCTCCTCTCAAGGTCCCCAGAAGCACAGCCAAAGACACTCCCT  
CTCACTGGCAGCACCTTCCATGACCAGATAGCCATGCTGAGCCACCGGTGC  
TTCAACACTCTGACTAACAGCTTCCAGCCCTCCTTGCTCGGCCGCAAGATT  
CTGGCCGCCATCATTATGAAAAAAGACTCTGAGGACATGGGTGTGTCGTC  
AGCTTGGGAACAGGGAATCGCTGTGTAAGGAGATTCTCTCAGCCTAAA  
AGGAGAAACTGTCAATGACTGCCATGCAGAAATAATCTCCCGGAGAGGCTT  
CATCAGGTTTCTCTACAGTGAGTTAATGAAATACAACCTCCAGACTGCGAA  
GGATAGTATATTTGAACCTGCTAAGGGAGGAGAAAAGCTCCAAATAAAAAA  
GACTGTGTCATTCCATCTGTATATCAGCACTGCTCCGTGTGGAGATGGCGCC  
CTCTTTGACAAGTCCTGCAGCGACCGTGCTATGGAAAGCACAGAATCCCGC  
CACTACCCTGTCTTCGAGAATCCCAAACAAGGAAAGCTCCGCACCAAGGT  
GGAGAACGGAGAAGGCACAATCCCTGTGGAATCCAGTGACATTGTGCCTA  
CGTGGGATGGCATTTCGGCTCGGGGAGAGACTCCGTACCATGTCCTGTAGTG  
ACAAAATCCTACGCTGGAACGTGCTGGGCCTGCAAGGGGCACTGTTGACC  
CACTTCTGCAGCCCATTTATCTCAAATCTGTACATTGGGTTACCTTTTCA  
GCCAAGGGCATCTGACCCGTGCTATTTGCTGTCGTGTGACAAGAGATGGGA  
GTGCATTTGAGGATGGACTACGACATCCCTTTATTGTCAACCACCCCAAGG  
TTGGCAGAGTCAGCATATATGATTCCAAAAGGCAATCCGGGAAGACTAAGG  
AGACAAGCGTCAACTGGTGTCTGGCTGATGGCTATGACCTGGAGATCCTGG  
ACGGTACCAGAGGCACTGTGGATGGGCCACGGAATGAATTGTCCCGGGTC  
TCCAAAAGAACATTTTTCTTATTAAAGAAGCTCTGCTCCTTCCGTTACC  
GCAGGGATCTACTGAGACTCTCCTATGGTGAGGCCAAGAAAGCTGCCCGT

GACTACGAGACGGCCAAGAACTACTTCAAAAAAGGCCTGAAGGATATGGG  
CTATGGGAACTGGATTAGCAAACCCAGGAGGAAAAGAACTTTTATCTCTG  
CCCAGTA [GATTACAAGGATGACGACGATAAG\(Flag tag\)](#) TAG-3'

### **ADAR1(p150) cDNA**

5'-

ATGAATCCGCGGCAGGGGTATTCCCTCAGCGGATACTACACCCATCCATTTC  
AAGGCTATGAGCACAGACAGCTCAGATACCAGCAGCCTGGGCCAGGATCT  
TCCCCAGTAGTTTCCCTGCTTAAGCAAATAGAATTTCTCAAGGGGCAGCTC  
CCAGAAGCACCGGTGATTGGAAAGCAGACACCGTCACTGCCACCTTCCCT  
CCCAGGACTCCGGCCAAGGTTTCCAGTACTACTTGCCTCCAGTACCAGAGG  
CAGGCAAGTGGACATCAGGGGTGTCCCCAGGGGCGTGCATCTCGGAAGTC  
AGGGGCTCCAGAGAGGGTTCCAGCATCCTTACCACGTGGCAGGAGTCTG  
CCACAGAGAGGTGTTGATTGCCTTTCCTCACATTTCCAGGAACTGAGTATC  
TACCAAGATCAGGAACAAAGGATCTTAAAGTTCCCTGGAAGAGCTTGGGGA  
AGGGAAGGCCACCACAGCACATGATCTGTCTGGGAAACTTGGGACTCCGA  
AGAAAGAAATCAATCGAGTTTTATACTCCCTGGCAAAGAAGGGCAAGCTAC  
AGAAAGAGGCAGGAACACCCCCTTTGTGGAAAATCGCGGTCTCCACTCAG  
GCTTGGAACCAGCACAGCGGAGTGGTAAGACCAGACGGTCATAGCCAAGG  
AGCCCCAAACTCAGACCCGAGTTTGGAAACCGGAAGACAGAAACTCCACAT  
CTGTCTCAGAAGATCTTCTTGAGCCTTTTATTGCAGTCTCAGCTCAGGCTTG  
GAACCAGCACAGCGGAGTGGTAAGACCAGACAGTCATAGCCAAGGATCCC  
CAAACCTCAGACCCAGGTTTGGAACTGAAGACAGCAACTCCACATCTGCC  
TTGGAAGATCCTCTTGAGTTTTTAGACATGGCCGAGATCAAGGAGAAAATC  
TGCGACTATCTTCAATGTGTCTGACTCCTCTGCCCTGAATTTGGCTAAAA  
ATATTGGCCTTACCAAGGCCCGAGATATAAATGCTGTGCTAATTGACATGGA  
AAGGCAGGGGGATGTCTATAGACAAGGGACAACCCCTCCCATATGGCATT  
GACAGACAAGAAGCGAGAGAGGATGCAAATCAAGAGAAATACGAACAGT  
GTTCCCTGAAACCGCTCCAGCTGCAATCCCTGAGACCAAAGAAACGCAGA  
GTTCCCTCACCTGTAATATACCCACATCAAATGCCTCAAATAACATGGTAACC  
ACAGAAAAAGTGGAGAATGGGCAGGAACCTGTCATAAAGTTAGAAAACA  
GGCAAGAGGCCAGACCAGAACCAGCAAGACTGAAACCACCTGTTTCATTAC  
AATGGCCCCTCAAAGCAGGGTATGTTGACTTTGAAAATGGCCAGTGGGCC  
ACAGATGACATCCCAGATGACTTGAATAGTATCCGCGCAGCACCAGGTGAG  
TTTCGAGCCATCATGGAGATGCCCTCCTTCTACAGTCATGGCTTGCCACGGT  
GTTACCCTACAAGAACTGACAGAGTGCCAGCTGAAGAACCCCATCAGC  
GGGCTGTTAGAATATGCCAGTTCGCTAGTCAAACCTGTGAGTTCAACATG  
ATAGAGCAGAGTGGACCACCCCATGAACCTCGATTTAAATTCCAGGTTGTC  
ATCAATGGCCGAGAGTTTCCCCAGCTGAAGCTGGAAGCAAGAAAGTGGC  
CAAGCAGGATGCAGCTATGAAAGCCATGACAATTCTGCTAGAGGAAGCCA  
AAGCCAAGGACAGTGGAAAATCAGAAGAATCATCCCCTATTCCACAGAG  
AAAGAATCAGAGAAGACTGCAGAGTCCAGACCCCCACCCCTTCAGCCAC  
ATCCTTCTTTTCTGGGAAGAGCCCCGTCACCACACTGCTTGAGTGTATGCA

CAAATTGGGGAACTCCTGCGAATTCCGTCTCCTGTCCAAAGAAGGCCCTGC  
CCATGAACCCAAGTTCCAATACTGTGTTGCAGTGGGAGCCCAAACCTTTCCC  
CAGTGTGAGTGCTCCCAGCAAGAAAGTGGCAAAGCAGATGGCCGCAGAG  
GAAGCCATGAAGGCCCTGCATGGGGAGGCGACCAACTCCATGGCTTCTGA  
TAACCAGCCTGAAGGTATGATCTCAGAGTCACTTGATAACTTGGAATCCATG  
ATGCCCAACAAGGTCAGGAAGATTGGCGAGCTCGTGAGATACCTGAACAC  
CAACCCTGTGGGTGGCCTTTTGGAGTACGCCCGCTCCCATGGCTTTGCTGC  
TGAATTCAAGTTGGTTCGACCAGTCCGGACCTCCTCACGAGCCCAAGTTCGT  
TTACCAAGCAAAAGTTGGGGGTCGCTGGTTCCCAGCCGTCTGCGCACACA  
GCAAGAAGCAAGGCAAGCAGGAAGCAGCAGATGCGGCTCTCCGTGTCTTG  
ATTGGGGAGAACGAGAAGGCAGAACGCATGGGTTTCACAGAGGTAACCCC  
AGTGACAGGGGCCAGTCTCAGAAGA ACTATGCTCCTCCTCTCAAGGTCCCC  
AGAAGCACAGCCAAAGACACTCCCTCTCACTGGCAGCACCTTCCATGACC  
AGATAGCCATGCTGAGCCACCGGTGCTTCAACACTCTGACTAACAGCTTCC  
AGCCCTCCTTGCTCGGCCGCAAGATTCTGGCCGCCATCATTATGAAAAAG  
ACTCTGAGGACATGGGTGTCTGTCGTCAGCTTGGGAACAGGGAATCGCTGT  
GTAAAAGGAGATTCTCTCAGCCTAAAAGGAGAACTGTCAATGACTGCCAT  
GCAGAAATAATCTCCCGGAGAGGCTTCATCAGGTTTCTCTACAGTGAGTTA  
ATGAAATACAACTCCCAGACTGCGAAGGATAGTATATTTGAACCTGCTAAG  
GGAGGAGAAAAGCTCCAAATAAAAAAGACTGTGTCAATCCATCTGTATATC  
AGCACTGCTCCGTGTGGAGATGGCGCCCTCTTTGACAAGTCCTGCAGCGA  
CCGTGCTATGGAAAGCACAGAATCCCGCCACTACCCTGTCTTCGAGAATCC  
CAAACAAGGAAAGCTCCGCACCAAGGTGGAGAACGGAGAAGGCACAATC  
CCTGTGGAATCCAGTGACATTGTGCCTACGTGGGATGGCATTCCGGCTCGGG  
GAGAGACTCCGTACCATGTCTGTAGTGACAAAATCCTACGCTGGAACGTG  
CTGGGCCTGCAAGGGGCACTGTTGACCCACTTCCTGCAGCCCATTTATCTC  
AAATCTGTCAATTGGGTTACCTTTTCAGCCAAGGGCATCTGACCCGTGCT  
ATTTGCTGTCTGTGACAAGAGATGGGAGTGCATTTGAGGATGGACTACGA  
CATCCCTTTATTGTCAACCACCCCAAGGTTGGCAGAGTCAGCATATATGATT  
CCAAAAGGCAATCCGGGAAGACTAAGGAGACAAGCGTCAACTGGTGTCTG  
GCTGATGGCTATGACCTGGAGATCCTGGACGGTACCAGAGGCACTGTGGAT  
GGGCCACGGAATGAATTGTCCCGGGTCTCCAAAAGAACATTTTTCTTCTA  
TTAAGAAGCTCTGCTCCTTCCGTTACCGCAGGGATCTACTGAGACTCTCCT  
ATGGTGAGGCCAAGAAAGCTGCCCGTGACTACGAGACGGCCAAGAACTAC  
TTCAAAAAGGCCTGAAGGATATGGGCTATGGGAACTGGATTAGCAAACCC  
CAGGAGGAAAAGA ACTTTTATCTCTGCCAGTA

[GATTACAAGGATGACGACGATAAG](#)(Flag tag) TAG-3'

## **ADAR2 cDNA**

5'-

ATGGATATAGAAGATGAAGAAAACATGAGTTCCAGCAGCACTGATGTGAAG  
GAAAACCGCAATCTGGACAACGTGTCCCCAAGGATGGCAGCACACCTGG  
GCCTGGCGAGGGCTCTCAGCTCTCCAATGGGGGTGGTGGTGGCCCCGGCA  
GAAAGCGGCCCTGGAGGAGGGCAGCAATGGCCACTCCAAGTACCGCCTG

AAGAAAAGGAGGAAAACACCAGGGCCCGTCCTCCCCAAGAACGCCCTGATGCAGCTGAATGAGATCAAGCCTGGTTTGCAGTACACACTCCTGTCCCAGACTGGGCCCGTGCACGCGCCTTTGTTTGTTCATGTCTGTGGAGGTGAATGGCCAGGTTTTTGGAGGGCTCTGGTCCCACAAAGAAAAAGGCAAAACCTCCATGCTGCTGAGAAGGCCTTGAGGTCTTTCGTTCAGTTTCCTAATGCCTCTGAGGCCCACCTGGCCATGGGGAGGACCCTGTCTGTCAACACGGACTTCACATCTGACCAGGCCGACTTCCCTGACACGCTCTTCAATGGTTTTGAAACTCCTGACAAGGCGGAGCCTCCCTTTTACGTGGGCTCCAATGGGGATGACTCCTTCAGTTCCAGCGGGGACCTCAGCTTGTCTGCTTCCCCGGTGCCTGCCAGCCTAGCCCAGCCTCCTCTCCCTGCCTTACCACCATTCCCACCCCCGAGTGGGAAGAATCCGTGATGATCTTGAACGAACTGCGCCCAGGACTCAAGTATGACTTCCTCTCCGAGAGCGGGGAGAGCCATGCCAAGAGCTTCGTTCATGTCTGTGGTCGTGGA TGGTCAGTTCTTTGAAGGCTCGGGGAGAAACAAGAAGCTTGCCAAGGCCCGGGCTGCGCAGTCTGCCCTGGCCGCCATTTTAACTTGCACCTGGATCAGACGCCATCTCGCCAGCCTATTCCCAGTGAGGGTCTTCAGCTGCATTTACCGCAGGTTTTAGCTGACGCTGTCTCACGCCTGGTCCTGGGTAAGTTTGGTGACCTGACCGACAACCTTCTCCTCCCCTCACGCTCGCAGAAAAGTGCTGGCTGGAGTCGTTCATGACAACAGGCACAGATGTTAAAGATGCCAAGGTGATAAGTGTCTACAGGAACAAAATGTATTAATGGTGAATACATGAGTGATCGTGGCCTTGCTATAAATGACTGCCATGCAGAAATAATATCTCGGAGATCCTTGCTCAGATTTCTTTATACACAACCTTGAGCTTTACTTAAATAACAAAGATGATCAAAAAAGATCCATCTTTCAGAAATCAGAGCGAGGGGGGTTTAGGCTGAAGGAGAATGTCAGTTTTCATCTGTACATCAGCACCTCTCCCTGTGGAGATGCCAGAATCTTCTCACCACATGAGCCAATCCTGGAAGAACCAGCAGATAGACACCCAAATCGTAAAGCAAGAGGACAGCTACGGACCAAAATAGAGTCTGGTGAGGGGACGATTCCAGTGCGCTCCAATGCGAGCATCCAAACGTGGGACGGGGTGCTGCAAGGGGAGCGGCTGCTCACCATGTCCTGCAGTGACAAGATTGCACGCTGGAACGTGGTGGGCATCCAGGGATCCCTGCTCAGCATTTCGTGGAGCCCATTACTTCTCGAGCATCATCCTGGGCAGCCTTTACCACGGGGACCACCTTTCCAGGGCCATGTACCAGCGGATCTCCAACATAGAGGACCTGCCACCTCTCTACACCCTCAACAAGCCTTTGCTCAGTGGCATCAGCAATGCAGAAGCACGGCAGCCAGGGAAGGCCCCCAACTTCAGTGTCAACTGGACGGTAGGCGACTCCGCTATTGAGGTCATCAACGCCACGACTGGGAAGGATGAGCTGGGCCGCGCGTCCGCCTGTGTAAGCACGCGTTGTACTGTGCTGGATGCGTGTGCACGGCAAGGTTCCCTCCCCTTACTACGCTCCAAGATTACCAAACCAACGTGTACCATGAGTCCAAGCTGGCGGCAAAGGAGTACCAGGCCGCAAGGCGCGTCTGTTCACAGCCTTCATCAAGGCGGGGCTGGGGGCCTGGGTGGAGAAGCCCACCGAGCAGGACCAGTTCTCACTCACGCC

[GATTACAAGGATGACGACGATAAG\(Flag tag\)](#) TAG-3'

### pLenti-MCS-mCherry backbone

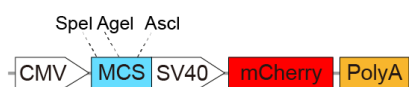

5'-

cgataagcttgggagttccgcgttacataacttacggtaaatggcccgcctggctgaccgccaacgacccccgccattg  
acgtcaataatgacgfatgttcccatagtaacgccaatagggactttccattgacgtcaatgggtggagatttacggtaaact  
gcccacttggcagtacatcaagtgtatcatatgccaagtacgcccctattgacgtcaatgacggtaaatggcccgcctggc  
attatgccagttacatgacctatgggactttcctacttggcagttacatctacgtattagtcacgctattaccatggatgagg  
tttggcagttacatcaatggggcgtggatagcgggttactcaggggatttccaagtctccaccattgacgtcaatgggag  
ttgttttggcaccaaaatcaacgggactttccaaaatgtcgtacaactccgcccattgacgcaaatgggcggttagcgt  
gtacgggtgggaggtctatataagcagagctcgttttagtaaccgtcagatcgcctggagacgccatccacgctgtttgacc  
tccatagaagacaccgactctagaggatccggactagtttaccgggtggggggccccggcgccgggtgtacacctgca  
gggggtttaaaccacgcgtcgaccagtggcgcacctgtggaatgtgtcagttagggtgtggaagtccccaggctccc  
cagcaggcagaagtatgcaagcatgcatctcaattagtcagcaaccaggtgtggaagtccccaggctccccagcagg  
cagaagtatgcaagcatgcatctcaattagtcagcaaccatagtcggcccctaactccgcccattcccgccttaactccg  
cccagttccgcccattctccgcccattggctgactaattttttattatgacagagccgaggccgcctcggcctctgagctat  
tccagaagtagtgaggaggcctttttggaggcctagccttttgcaaaagctatcgctagctcgagatggtagcaagggc  
gaggaggataacatggccatcatcaaggagttcatgcgcttcaaggtgcacatggagggtcctcgtgaacggccacgagtt  
cgagatcgaggggcaggggcaggggcccccctacgagggcaccagaccgccaagctgaaggtgaccaaggggtgg  
ccccctgcccttcgctgggacatcctgtcccctcagttcatgtacggctcaaggcctacgtgaagcaccggccgacat  
ccccgactactgaagctgtccttcccaggggcttcaagtgggagcgcgtgtgaactcgaggacggcggcgtggtga  
ccgtgaccaggactcctcctgcaggacggcagttcatctacaaggtgaagctgcgcggcaccacttcccctccgac  
ggccccgtaatgcagaagaagaccatgggctgggaggcctcctccgagcggatgtaccccaggacggcgcctgaa  
gggcgagatcaagcagaggctgaagctgaaggacggcggcactacgacgtgaggtcaagaccactacaaggcca  
agaagcccgtgcagctgccggcctacaacgtcaacatcaagttgacatcacctcccacaacgaggactacaccatc  
gtggaacagtacgaacgcgccgaggggccactccaccggcgcatggacgagctgtacaagtaagctaagcacttc  
gtggccgaggagcaggactgagaattccagtcgacaatcaacctctggattacaaaatttgtgaaagattgactggtattctt  
aactatgtgtccttttacgctatgtggatagcgtgcttaatgcctttgtatcatgctattgcttcccgtatggcttcattttctct  
cctgtataaatcctggtgtgtctctttatgaggagttgtggcccgttgcaggcaacgtggcgtggtgtgactgtgtttgtc  
gacgcaacccccactggttggggcattgccaccactgtcagctcctttccgggacttctgcttccccctcctattgccac  
ggcggaaactatcgcgcctgccttcccgcctgctggacaggggctcggctgttgggactgacaattccgtggtgtgtc  
ggggaaagctgacgtccttccatggctgctcgcctgtgttccacctggattctgcgcgggacgtccttctgctacgtcctt  
cggccctcaatccagcggaccttcttcccggcctgctgcggcctctgcggcctcttccgcgtcttcccttgccttgcctca  
gacgagtcggatcctcttgggccctccccgcctggaattcagctcggctacctttaaagaccaatgacttacaaggcag  
ctgtagatcttagccactttttaaagaaaaggggggactggaagggctaattcactccaacgaagacaagatctgctttt  
gctgtactgggtctctctggttagaccagatctgagcctgggagctctctggctaactagggaaaccactgcttaagcctca  
ataaagctgcctgagtgctcaagtagtgtgtcccgtctgtgtgactctgtaactagagatccctcagacccttttagt  
cagtggtgaaaatctctagcagtagtagtcatgtcatctattattcagattataactgcaagaaatgaatatcagagagt  
gagaggaactgtttattgcagcttataatggttacaataaagcaatagcatcacaatttcacaaataaagcattttttcact  
gcattctagttgtgttttgcacaaactcatcaatgtatcttcatgtctggtcttagctatcccggcccta-3'

## pLenti-arRNA-BFP backbone

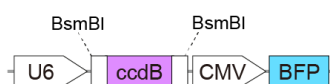



5'-

gagggcctatttcccatgattccttcatattgcatatacgatacaaggctgtagagagataaftagaattaatttgactgtaaa  
cacaaagatatttagtcaaaaatcgtgacgtagaaagtaataatttctgggtagttgacgttttaaattatgtttaaatgga  
ctatcatatgcttaccgtaactgaaagtatttcgatttctggctttatatacttggtaaaggacgaaacaccgagagacgct  
ggcttatacgaattaatacgaactactataggagaccaagctggctagttaaactatcaacaagttgtacaaaaagctg  
aacgagaaacgtaaaatgatataaatcaatataatataaattagattttgcataaaaaacagactacataaactgtaaaacaca  
acatatccagtcactatgaatcaactacttagatggattagtacgtgtagtgaccgacagccttccaaatgttcttggggtg  
atgctgccaacttagtcgaccgacagccttccaaatgttcttctcaaacggaatcgtcgtatccagcctactcgtattgtcctc  
aatgccgtatataatcataaaaagaaataagaaaaagaggtgagcctctttttgtgtgacaaaaataaacatctacat  
tcatatacgtagtgtcatagtctgaaatcatctgcatcaagaacaatttcacaactcttatacttttcttacaagtcgttcg  
gcttcatctggatttcagcctctatactactaaacgtgataaagtcttctgtaatttctactgtatcgacctgcagactggctgtg  
ataagggagcctgacatttatattcccagaacatcaggtaattggcgttttgatgcatcttcgcggtggctgagatcagcca  
cttctccccgataacggagaccggcacactggcctatcgggtgctcatgcgccagcttccatccccgatatgcaccac  
cgggtaaaagttcacgggagactttatctgacagcagacgtgactggccagggggatcaccatccgtcggccggcgtg  
caataatacactctgtacatccaaaacagacgataacggctctctttttaggtgtaaaccttaaactgcattcaccagc  
ccctgtctcgtcagcaaaagagccgttcattcaataaacggggcagcctcagccatcccttctgattttccgcttccagc  
gttcggcagcagacgacgggcttctctgcatggtgtgcttaccagaccggagatattgacatcatatagccttgagca  
actgatagctgtcgtgtcaactgtcactgtaatacgtgcttcatagcatacctcttttgacatactcgggtatacatatcagt  
atatattcttataccgcaaaaatcagcgcgcaaacgcatactgttacttggcttttagtaagccggatccacgcccgttta  
cgccccctgccactcatcgcagctactgttgaattcattaagcattctgccgacatggaagccatcacaacggcatgatg  
aacctgaatgccagcggcatcagcacctgtcgccttgcgtataatattggccatggtgaaaacggggcgaagaagt  
gtccatattggccagtttaaatcaaaactgggtgaaactcaccagggattggctgagacgaaaaacatattcctaataacc  
ctttagggaataggccaggtttaccgtaaacgccacatcttgcgaatatatgtgtagaactgccggaatcgtcgtgg  
tattcactccagagcagatgaaaactgttcagttgctcatgaaaacgggtgtaacaagggtgaacactatccatcaccag  
ctcaccgtttcattgccatagcgaattccggatgagcattcatcagcgggcaagaatgtgaataaaggccggataaaac  
ttgtgctattttcttaccgctttaaaggccgtaatatccagctgaacggctggttataggtacattgagcaactgactga  
aatgctcaaaatgttcttaccgatgccattgggatatacaacgggtggtatataccagtgatttttctccatttagcttcttagc  
tctgaaaatctcgataactcaaaaatagcccggtagtgatcttatttattatggtgaaagttggaacctctacgtgccga  
tcaacgtctcatttccgcaaaagtggcccagggctcccggatcaacagggacaccaggtattatttctgcgaagtga  
tcttccgtcacaggtatttctggcgaagtgcgtcgggtgatgctgcaacttagtcgactacaggtcactaatacatct  
aagtagttgattcatagtactggatattgtgttttacagtattatgtagtctgtttttatgcaaaatcaatthaataatgatatt  
tatatcattttacgttctcgttcagcttctgtacaaagtgggtgatctagagggcccgcggctcgaacgtctctgatcatatg  
gcgcgcccctcaggtcgcaggtatcgataagctcgttccagagattccagcaggtcaggggacctaataactcgtatag  
catacattatacgaagtattattaaggggtccaagcttaagcggccgctggataaccgtattaccgcatgattagttat  
tagtaatcaattacggggctcattagttcatagcccatafatggagttccgcttacataactacggtaaatggcccgcctggc  
tgaccgccaacgacccccgccattgacgtcaataatgacgtatgtccatagtaacgccaatagggacttccattgac  
gtcaatgggtggagtattacggtaaacgccacttggcagctacatcaagtgtatcatatgccaagtacgccccctattgac  
gtcaatgacggtaaatggcccgcctggcattatgccagctacatgacctatgggacttctacttggcagctacatctacgta  
ttagtcatcgtattaccatggtgatcggtttggcagctacatcaatgggcgtggatagcggttgactcacggggattcca  
agtctccacccttaccgacgtcaatgggagttgtttggcaccaaaatcaacgggacttccaaaatgctgtaacaactccgc  
cccattgacgcaaatgggcggtaggcgtgacgggtgggaggtctataaagcagagctggttagtgaaccgtcagatccg  
ctagcggcaccatgagcagctgattaaggagaacatgcacatgaagctgtacatggagggcaccgtggacaacctca  
cttcaagtgcacatccgagggcgaaggcaagccctacgagggcaccagaccatgagaatcaaggtggtcagggcg  
gcccctccccctcgcctcgcactcctggctactagcttctctacggcagcaagaccttcaaccaacaccagggcctc

cccgacttctcaagcagtccttccctgagggcttcacatgggagagagtcaccacatacgaagacggggcgtgctgac  
cgctaccaggacaccagcctccaggacggctgectcatctacaacgtcaagatcagaggggtgaacttcacatccaacg  
gccctgtgatcagaagaaaactcggctgggaggccttcaccgagactctgtaccccgctgacggcggcctggaagg  
cagaaacgacatggccctgaagctcgtggcgggagccatctgatcgaaacatcaagaccacatataagcaagaaa  
cccgctaagaacctcaagatgcctggcgtctactatgtggactacagactggaaagaatcaaggaggccaacaacgaga  
cctacgtcagcagcacgaggtggcagtgccagatactgcgacctccctagcaaacggggcacaactcaattaa-3'

### Coding sequence (CDS) of the disease-relevant genes

COL3A1

5'-

atgatgagctttgtcaaaaggggagctggctacttctcgtctgcttcatcccactattatttggcacaacaggaagctgtg  
aaggaggatgttcccatcttgctcagtcctatgcggatagagatgtctggaagccagaacctgccaatatgtgtctgtga  
ctcaggatccgttctcgcgatgacataatatgtgacgatcaagaattagactgccccaacccagaaattccatttgagaat  
gttgctcagtttggccacagcctccaactgctcctactgcctcctaattggtcaaggacctcaaggcccaaggagatcc  
aggccctcctggtattcctgggagaaatggtgacctggtattccaggacaaccagggtcccctggttctcctggccccct  
ggaatctgtaatcatgcctactggtcctcagaactatttccccagtatgattcatatgatgtcaagtctggagtagcagta  
ggaggactcgcaggctatcctggaccagctggccccccaggccctcccgggtcccctggtacatctggtcatcctggttcc  
cctggatcctcaggataccaaggacccccctggtgaacctgggcaagctggtcctcaggccctccaggacctcctggtgct  
ataggtccatctggtcctgctggaaaagatggagaatcaggtagacccggacgacctggagagcgaggattgctggac  
ctccaggatcaaaggtccagctgggatacctggattccctggtatgaaaggacacagaggcttcgatggacgaaatgga  
gaaaagggtgaaacaggtgctcctggattaaagggtgaaaatggtcttccaggcgaaaatggagctcctggacctatggg  
tccaagaggggctcctggtgagcaggacggccaggacttctggggctgcaggtgctcggggtaatgacggtgctcga  
ggcagtgatggtcaaccaggccctcctggtcctcctggaactgccgattccctggatcccctggtgctaagggtgaagtt  
ggacctgcagggtctcctggtcaaatggtgccccctggacaaagaggagaacctggacctcaggacacgctggtgctc  
aaggctcctcctggccctcctgggattaatggttagtctcctggtgtaaaaggcgaatgggtcccctggtcattcctggagctcc  
tggactgatgggagcccggggtcctccaggaccagccggtgctaattggtgctcctggactgcgaggtggtcaggtgag  
cctggtagaatggtgccaaggagagcccggaccacgtggtgaacgcggtgaggctggtattccaggtgtccaggag  
ctaaaggcgaagatggcaaggatggatcacctggagaacctggtgcaaatgggcttccaggagctgcaggagaaaggg  
gtgccccctgggttccaggacctgctggacaaatggcatcccaggagaaaagggtcctgctggagagcgtggtgctcc  
aggccctgcagggccagaggagctgctggagaacctggcagagatggcgtccctggaggtccaggaatgaggggca  
tggccggaagtccaggaggaccaggaagtgatgggaaaccagggcctcccggagtcaggagaaagtgtcgacca  
ggtcctcctgggccatctggtccccgaggtcagcctggtgctatgggcttcccggctcctaaaggaaatgatggtgctcctg  
gtaagaatggagaacgaggtggccctggaggacctggccctcagggtcctcctggaaagaatggtgaaactggacctca

gggacccccaggcctactgggcctggtggtgacaaaggagacacaggacccccctggtccacaaggattacaaggctt  
gcctggtacaggtggtcctccaggagaaaatggaaaacctggggaaccagggtccaaagggtgatccgggtgcacctgg  
agctccaggaggcaagggtgatgctggtgccccctggtgaactggacctcctggattggcagggggccccaggacttaga  
ggtggagctggtccccctggtcccgaaggaggaaagggtgctgctggtcctcctggggccacctggtgctgctggtactcc  
tggtctgcaaggaatgcctggagaaagaggaggtcttggaaagtctggtccaaagggtgacaagggtgaaccaggcggt  
ccagggtctgatggtgtcccagggaagatggcccaagggtcctactggtcctattggtcctcctggcccagctggcca  
gcctggagataagggtgaaggtggtgccccggacttccaggatatagctggacctcgtggtagccctggtgagagaggt  
gaaactggccctccaggacctgctggtttccctggtgctcctggacagaatggtgaacctggtggtaaaggagaaaagg  
ggctccgggtgagaaagggtgaaggaggccctcctggagttgcaggacccccctggagggtctggacctgctggtcctcctg  
gtccccaagggtgcaaaagggtgaactggcagtcctggtggacctggtgctgctggttccctggtgctcgtggtcttctgg  
tctcctggtagtaatgtaaccaggacccccagggtccagcgggttccaggcaaggatgggccccaggctctgcgg  
gtaacctggtgctcctggcagccctggagtgctggacaaaagggtgatgctggccaaccaggagagaagggatgcc  
tggtgcccaggggcccaccaggagctccaggcccacttgggattgctgggatcactggagcacggggtcttgcaggacca  
ccaggcatgccaggctctaggggaagccctggccctcagggtgtcaagggtgaaagtgggaaaccaggagctaacggt  
ctcagtggagaacgtggtccccctggacccccagggtcttctggtctggctggtacagctggtgaacctggaagagatgg  
aaacctggatcagatggtcttccaggccgagatggatcctcctggtggcaagggtgatcgtggtgaaaatggctcctcctggt  
ggccctggcgctcctggtcatccaggcccacctggtcctgctggctccagctggaaagagtggtgacagaggagaaatg  
gcctgctggccctgctggtgctcccggctcctgctggttcccagggtgctcctggtcctcaaggcccacgtggtgacaaag  
gtgaaacagggtgaactggagctgctggcatcaaaggacatcaggattccttggtaatccagggtgcccagggttctcca  
ggccctgctggtcagcagggtgcaatcggcagtcaggacctgcaggccccagaggacctgttgaccacgtggacctc  
ctggcaaaagatggaaccagtggacatccagggtccattggaccaccagggcctcaggtaacagaggtgaaagaggat  
ctgagggtccccaggccaccagggaaccaggccctcctggacctcctggtgccccctggtccttctggtggtggtg  
gagccgctgccattgctgggattggaggtgaaaaagctggcggttttggccctgattatggagatgaaccaatggattcaa  
aatcaacaccgatgagattatgacttcaactcaagtctgtaaatggacaaaatagaaagcctcattagtctgatggttctgtaaa  
aaccccgctagaaactgcagagacctgaaattctgccatcctgaaactcaagatggagaatactgggtgaccetaaccaa  
ggatgcaaattggatgctatcaaggatttctgtaatatggaactggggaacatgcataagtccaatcctttgaatgtcca  
cggaaacactggtggacagattctagtctgagaagaaacacgtttggttggagagtccatggatggtggtttcagtttag  
ctacggcaatcctgaacttctgaagatgctcttgatgctgcagctggcattccttctgacttctcctccagcgagcttccagaa  
catcacatcactgcaaaaaatgacattgcatacatggatcaggccagtggaatgtaaagaaggccctgaagctgatggg  
gtcaaatgaagggtgaattcaaggctgaaggaaatagcaattcacctacacagttctggaggatggtgacgaaacacac  
tggggaatggagcaaaacagcttttgaatatgaacacgcaaggctgtgagactacctattgtagatattgcaccctatgac

attggtgctcctgatcaagaatttgggtggacgttggccctgtttgcttttataa-3'

## **BMP2**

5'-

atgacttctcgcctgcagcggccctggcgggtgccctggctaccatggaccatcctgctggtcagcgcctgcggctgcttcg  
cagaatcaagaacggctatgtgcgttaaagatccgtatcagcaagacctgggataggtgagagtagaatctctcatgaaa  
atgggacaatattatgctcгааaggtagcacctgctatggcctttgggagaaatcaaaagggacataaatcttgtaaaca  
aggatgttggctcacattggagatcccaagagtgcactatgaagaatgtgtagtaactaccactcctcctcaattcagaa  
tggaacataccgtttctgctgtttagcacagattatgtaatgtcaacttactgagaatttccacctctgacacaacaccac  
tcagtccacctcattcattaccgagatgagacaataatcattgctttggcatcagtctctgtattagctgtttgtagtgcctt  
atgctttggatacagaatgtgacaggagaccgtaacaaggtcttcacagtatgaacatgatggaggcagcagcatccga  
accctctcttagctagataatctgaaactgttggagctgattggccgaggtcgatattggagcagtatataaaggctccttgg  
tgagcgtccagttgctgtaaaagtgtttccttgcaaaccgtcagaatttatcaacgaaaagaacatttacagagtgcctttg  
atggaacatgacaacattgcccgtttatagttggagatgagagagtcactgcagatggacgcatggaatattgcttgtgat  
ggagtactatcccaatggatctttatgcaagtatttaagtctccacacaagtactgggtaagctcttgccttctgctcattctg  
ttactagaggactggcttattctcacacagaattaccacgaggagatcattataaacctgcaatttccatcgagatttaaaca  
gcagaaatgtcctagtgaaaatgatggaacctgtgtattagtactttggactgtccatgaggctgactggaatagactg  
gtgcgccaggggaggaagataatgcagccataagcaggttggcactatcagatatatggcaccagaagtgctagaag  
gagctgtgaacttgaggactgtgaatcagcttgaacaagtagacatgtatgctcttggactaatctattgggagatattat  
gagatgtacagaccttcccaggggaatccgtaccagagtaccagatggctttcagacagaggttggaaacctcccac  
ttttgaggatatgcaggttctgctgtctagggaaaaacagagaccaagttccagaagcctggaaagaaaatagcctggc  
agtgaggtcactcaaggagacaatcgaagactgttgggaccaggatgcagaggctcggcttactgcacagtgtgctgagg  
aaaggtatggctgaacttatgatattgggaaagaacaaatctgtgagccaacagtcaatccaatgtctactgctatgcag  
aatgaacgcaacctgtcacataataggcgtgtgcaaaaattggccttatccagattattctctctcctacattgaagact  
ctatccatcactgacagcatcgtgaagaatattctctgagcattctatgtccagcacaccttgactataggggaaaaaa  
accgaaattcaattaactatgaacgacagcaagcacaagctcgaatcccagccctgaaacaagtgcaccagcctctcca  
ccaacacaacaaccacaaacaccacaggactcacgccaagtactggcatgactactatatctgagatgccataccagat  
gaaacaaatctcataccacaaatgttcacagtcattgggccaaccctgtctgcttacagctgacagaagaagacttgg  
aaaccaacaagctagacccaaaagaagttgataagaacctcaaggaaagctctgatgagaatctcatggagcactcttta  
aacagttcagtgggccagaccactgagcagtagttagctttagcttaccactcataaaactgtagtagaagcaact  
ggacagcaggacttcacacagactgcaaatggccaagcatgtttgattctgatgttctgctactcagatctatctctcccc

aagcagcagaacctccaagagacctactagttgctttgaacacaaaaattcaacaaaagagccccggctaaaatttg  
gcagcaagcacaatcaactgaaacaagtcgaaactggagttgccaagatgaatacaatcaatgcagcagaacctcat  
gtggtgacagtcacatgaatggtgtggcaggtagaaccacagtgtaactcccatgctgccacaaccaatgccaat  
gggacagtfactatctggccaacaaccaatagtgacacataggcccaagaatgttgagaatcagtttattggtgag  
gacaccggctgaatattaattccagtcctgatgagcatgagccttactgagacgagagcaacaagctggccatgatgaa  
ggtgttctggatcgtctgtggacaggagggaacggccactagaaggtggccgaactaattccaataacaacaacagcaat  
ccatgttcagaacaagatgttcttgacagggtgtccaagcacagcagcagatcctggccatcaaagcccagaagagc  
acagaggcctaattctctggatcttcagccacaatgtcctggatggcagcagtatacagatagtgagtcaacacaagat  
ggcaaatcaggatcaggtgaaaagatcaagaacgtgtgaaaactccctattcttaagcgggtggcggcccctccacctgg  
gtcatctccactgaatcgtgactgtgaagtcaacaataatggcagtaacagggcagttcattccaatccagcactgctgt  
ttacctgcagaaggagcactgctacaacctggtgtctaaagatataggaatgaactgtctgtga-3'

## AHI1

5'-

atgcctacagctgagagtgaagcaaaagtaaaaaccaaagttcgctttgaagaattgcttaagaccacagtgatctaagc  
gtgaaaagaaaaactgaagaaaaaactgtcaggtctgaagaaaacatctcacctgacactattagaagcaatcttactat  
atgaaagaaactacaagtgatgatcccgcactattagaagcaatctccccatattaagaaactacaagtgatgatgtaag  
tgctgtaacactaacaacctgaagaagagcacgagagtcactaaaaacaattgaggaacacacagttagcaactgaaa  
atcctaattggtgatgctagtgtagaggaagacaacaaggaaagccaaataaaaaaggatgataaagacgggtgccccagttg  
actacacaagacctgaaaccgaaactcctgagaataaggttgattctacacaccagaaaacacatacaaagccacagcc  
aggcgttgatcatcagaaaagtgaagaggcaaatgaggggaagagaagagactgattagaagaggatgaagaattgatg  
caagcatatcagtgccatgtaactgaagaaatggcaaggagattaagaggaaaataagaagaaactgaaagaacagtt  
gacttactttccctcagatactttattccatgatgacaaactaagcagtgaaaaaaggaaaaagaaaaaggaaagtccagttt  
ctctaaagctgaaacaagtacattgaccatctctggtgacacagttgaaggtgaacaaaagaaagaatcttcagttagatca  
gtttctcagattctcatcaagatgatgaaataagctcaatggaacaaagcacagaagacagcatgcaagatgatacaaac  
ctaaacaaaaaaacaaaaaagaagactaaagcagttgcagataataatgaagatggtgatggtgatggtgtcatgaaat  
aacaagccgagatagcccggttatcccaaatgtttgcttgatgatgaccttgccttgggagttacattcaccgaactgatag  
acttaagtcagattttatgattctcaccatggtaaaaattcatgtggtgatgagcactactggtcaatgtcaagaaagatg  
atagtgacggcctgtttcatcttactatgaaaaagagaatgtggattatattcttctattatgaccagccatgattttaac  
agttaaaatcaagactccagagtggaagaacaattgtatttaataaaaatttccctatttcttcgaggctctgatgagag  
tcctaaagtcactcgttctttgagattcttgatttcttaagcgtggatgaaattaagaataattctgaggttcaaaaccaagaatg

tggtttcggaaaattgcctgggcatttcttaagcttctgggagccaatggaaatgcaaactcaactcaaaactcgttgcagctatattaccacactactaagcctcgcgacccatttaagtggttgaggcatttgaatgggtgcaaaatgtccaagaatcat  
taccatcaacactgtacgtaactgtaagaggactgaaagtccagactgtataagccatcttaccgctctatgatggctctt  
caggaggaaaaaggtaaaccagtgcattgtgaacgtcaccatgagcaagctcagtagacacagaacctggattagaaga  
gtcaaaggaagtaataaaggtaaacgactccctggcaggcttgcctatcccaacaacacctcttctactaaatgc  
aggagaacgaggatgttttcttctgatttctcccacaatggaagaatattagcagcagcttgcagccgggatggatc  
caatttttatatgaaattccttctggacgtttcatgagagaattgtgtggccacctcaatatcattatgatcttctggcaaa  
agatgatcactacatccttactcatctgatggcactgccaggatggaaaaatgaaataacaatacaataactttag  
agttttacctcatccttctttgtttacacggctaaattccatccagctgtaagagagctagtagttacaggatgctatgattccat  
gatacggataggaaagttgagatgagagaagattctgccatattggcggacagttgacgttcacaaaagtttatcaactc  
actttgtttgatactgaaggtcatcatatgtattcaggagattgtacaggggtgattgttttgaatacctatgcaagattaat  
gatttgaacattcagtcaccactggactataaataaggaaattaagaaactgagtttaagggaattccaataagttattg  
gagattcatcccaatggaaaacgtttgtaatccatacacaagacagctacttgagaattatggatctccggatattagtagca  
aggaagtttaggagcagcaattatcgggagaagattcatagtactttgactccatgtgggacttttctgttctggaagt  
gaggatggtatagtgtatgtttggaaccagaaacaggagaacaagtagccatgtattctgacttgcattcaagtcacccat  
tcgagacatttctatcatccattgaaaatatggttgcattctgtgcatttgggcaaaatgagccaattcttctgtatattacgatt  
tccatgttcccagcaggaggctgaaatgtcaaacgctacaatggaacatttccattacctggaatacaccaaagtcagat  
gccctatgtacctgtcaaaaactacccatcaaggctctttcagattgatgaattgtccacactgaaagttctcaacgaaga  
tgcaactagtaaaaacagaggcttgaactgtcacagaggtgatacgttctgtgctgcaaaagtcaacaaaaatctctcattt  
acttaccaccagcagtttctcacaacagtctaagttaaagcagtcacaacatgctgaccgctcaagagattctacatcagttt  
ggttactcagaccgggattatcagcatagaaagaaagccttgaaccatcaggtagatacagcaccaacggtagtggct  
ctttatgactacacagcgaatcgcagatgaactaacatccatcgcggagacattatccgagtgttttcaaagataatgaa  
gactggtggtatggcagcataggaaaggacaggaaggttatttccagctaatcatgtggctagtgaacactgtatcaag  
aactgcctcctgagataaaggagcgcgacccctcttfaagccctgaggaaaaactaaaatagaaaaatctccagctcctca  
aaagcaatcaatcaataagaacaagtcccaggacttcagactaggctcagaatctatgacacattctgaaatgagaaaaaga  
acagagccatgaggaccaaggacacataatggatacacggatgaggaagaacaagcaagcaggcagaaaaagtcactct  
aatagagta-3'

## FANCC

5'-

atggctcaagattcagtagatcttcttctgtgattatcagtttggatgcagaagcttctgtatgggatcaggcttccacttggaa

accagcaagacacctgtcttcacgtggctcagttccaggagttcctaaggaagatgtatgaagccttgaaagagatggatt  
ctaatacagtcattgaaagattccccacaattgggtcaactgttggcaaaagcttgttggaaatcctttatatttagcatatgatgaa  
agccaaaaaattctaataatgggtcttatgtgtcctaattaacaaagaaccacagaattctggacaatcaaaacttaactcctgga  
tacaggggtgtattatctcatatactttcagcactcagatttgataaagaagttgctcttttactcaaggcttgggtatgcaccta  
tagattactatcctggttgccttaaaaataggtttatcattagcgtctgaactcagagagaatcatcttaatggatttaactca  
aaggcgaatggctcccagcagtggtggtccctgtcacgagtttgtgtccactattaccctgacagatggtgaccccctg  
gtggaggctctcctcatctgtcatggacgtgaacctcaggaaatcctccagccagagttctttgaggctgtaaacgaggcca  
ttttgctgaagaagatttctctccccatgtcagctgtagtctgcctctggcttcggcacctccagccttgaaaaagcaatgct  
gcatcttttgaaaagctaattcctcagtgagagaaattgtctgagaaggatcgaatgcttataaaagattcatcgtgcctcaa  
gcagcctgccaccctgccatattccgggtgtgatgagatgttcaggtgtgcactcctggaaaccgatggggccctggaa  
atcatagccactattcaggtgttacgcagtgctttgtagaagctctggagaaagcaagcaagcagctgcgggttgactcaa  
gacctttccttacacttctccatctcttgccatgggtgctgctgcaagaccctcaagatatccctcggggacactggctcca  
gacctgaagcatatttctgaactgctcagagaagcagttgaagaccagactcatgggtcctgcggaggctcccttgagag  
ctggtcctgttcattcacttcggaggatgggctgagatggtggcagagcaattactgatgtcggcagccgaacccccac  
ggccctgctgtggctcttggccttactacggccccgtgatgggaggcagcagagagcagactatggtccaggtga  
aggccgtgctgggccacctcctggcaatgtccagaagcagcagcctctcagcccaggacctgcagacggtagcaggac  
agggcacagacacagacctcagagctcctgcacaacagctgatcaggcaccttctcctcaattcctgctctgggctctg  
gaggccacacgatgcctgggatgtcatcacctgatggctcacactgctgagataactcacgagatcattggctttctga  
ccagacctgtacagatggaatcgtcttggcattgaaagccctagatcagaaaaactggcccagagctcctaaagagct  
gcgaactcaagtctag-3'

### MYBPC3

5'-

atgcctgagccggggaagaagccagctctcagcttttagcaagaagccacgggtcagtggaagtggccgaggcagccctg  
ccgtgtcagggccgagacagagcgggcaggagtgaaggtgcgctggcagcgggagggcagtgacatcagcggccag  
caacaagtacggcctggccacagagggcacacggcatacgtgacagtgcggggaagtgggcccctgccgaccagggat  
cttacgcagtcattgtggtcctccaaggtcaagttcgacctcaaggtcatagaggcagagaaggcagagcccatgctgg  
ccccctgccctgccctgctgaggccactggagccccctggagaagccccggccccagccgctgagctgggagaaagt  
cccaagtcccaaagggtcaagctcagcagctctcaatggtcctaccctggagccccgatgacccattggcctcttc  
tgatgcggccacaggatggcgaggtgacctgggtggcagcatcaccttctcagcccgcgtggccggcgccagcctct  
gaagccgctgtggtcaagtgttcaaggcaaatgggtggacctgagcagcaaggtgggcccagcacctgcagctgca

cgacagctacgaccgcgccagcaaggtctatctgttcgagctgcacatcaccgatgccagcctgccttactggcagcta  
ccgctgtgaggtgtccaccaaggacaaatttgactgctccaacttcaatctcactgtccacgaggccatgggcaccggaga  
cctggacctcctatcagcctccgccgcacgagcctggctggaggtggcggcgatcagtgatagccatgaggacactg  
ggattctggacttcagctcactgctgaaaaagagagacagtttccggaccccagggactcgaagctggaggcaccagc  
agaggaggacgtgtgggagatcctacggcagggcaccatctgagtacgagcgcacgccttccagtacggcgtcact  
gacctgcgcggcatgctaaagaggctcaaggcatgaggcgcgatgagaagaagagcacagccttccagaagaagctg  
gagccggcctaccaggtgagcaaaaggccacaagatccggctgacctggaactggctgacctgacgctgaggtcaaa  
tggctcaagaatggccaggagatccagatgagcggcagcaagtacatctttgagtccatcgggtccaagcgtaccctgac  
catcagccagtgtcattggcggacgacgcagcctaccagtgcgtgggtgggtggcgagaagtgtacacggagctctttg  
tgaagagccccctgtgctcatcacgcgcccttgaggaccagctggatgggtggggcagcgggtggagtttgagtg  
gaagtatcggaggagggggcgaagtcaaatggctgaaggacgggggtggagctgaccgggaggagacctcaata  
ccggttcaagaaggacgggcagagacaccctgatcatcaacgaggccatgctggaggacgcggggcactatgcact  
gtgactagcggggccaggcgtggctgagctcattgtgcaggaaaagaagctggaggtgtaccagagcatcgaga  
cctgatgggtgggcgaaaggaccaggcgggtgtcaaatgtgaggtctcagatgagaatgttcgggggtgtggctgaaga  
atgggaaggagctgggtgccgacagccgataaagggtgtccacatcgggcgggtccacaaactgaccattgacgacgt  
cacactgccgacgaggtgactacagctttgtgccgagggttcgctgcaacctgtcagccaagctccacttcatgga  
ggctcaagattgacttctgaccaggcaggaacctccaagatccacctggactgccaggccgataaccagacaccattg  
tggtttagctggaaataagctactgttgacgtccctatctctggggaccctgctcccactgtgatctggcagaaggctatc  
acgcaggggaataaggccccagccaggccagccccagatgccccagaggacacaggtgacagcgtgagtggtgtt  
tgacaagaagctgtgtgtgagaccgaggccgggtccgcgtggagaccaccaaggaccgcagcatcttcacggtcga  
gggggcagagaaggaaagatgaggcgtctacacggctcacagtgaagaacctgtgggcgaggaccaggtcaacctca  
cagtcaaggtcatcgacgtgccagacgcacctgcggcccccaagatcagcaacgtgggagaggactcctgcacagtac  
agtgggagccgctgcctacgatggcgggcagccatcctgggtacatcctggagcgaagaagaagaagagctacc  
gggtgatgcggctgaacttcgacctgattcaggagctgagtcataaagcgcggcgcgatgatcagggcgtggtgtacga  
gatgcgcgtctacgcggtcaacgccatcggcatgtccaggccccagccctgcctcccagcccttcatgcctatcgggtcccc  
cagcgaaccaccacctggcagtagaggacgtctctgacaccacggctcctcaagtggcggccccagagcgcgt  
gggagcaggaggcctggatggctacagcgtggagtactgccagagggtgctcagagtgggtggctgccctgcaggg  
gctgacagagcacacatcgatactggtgaaggacctgccacggggggcccggctgctttccgagtgcgggcacacaat  
atggcagggcctggagcccctgttaccaccacggagccggtgacagtgcaggagatcctgcaacggccacggcttcag  
ctgcccaggcacctgcgccagaccattcagaagaaggtcggggagcctgtgaaccttctcatcccttccagggaagcc  
ccggcctcaggtgacctggaccaaaagagggggcagccccctggcagggcagggaggtgagcatccgcaacagccccaca



gacaccatcctgttcatccgggccgctcgccgctgcattcaggaacttaccaggtgacggtgcgcattgagaacatgga  
ggacaaggccacgctggtgctgcaggtgtgacaagccaagtctccccaggatctccgggtgactgacgcctggggtc  
ttaatgtggctctggagtggaagccacccaggatgtcggcaacacggagctctgggggtacacagtgcagaaagccga  
caagaagaccatggagtggttcaccgtcttgagcattaccgccgacccactgcgtggtgccagactcatcattggcaa  
tggctactactccgcgtcttcagccagaatattggttgctttagtgacagagcggccaccaccaaggagcccgtctttatcc  
ccagaccaggcatcacctatgagccaccaactataaggccctggacttctccgaggcccaagcttaccagcccctg  
gtgaaccgctcggtcatcgcgggctacactgctatgctctgctgtgcttccgggtagcccaagcccaagatttctgtg  
tcaagaatggcctggacctgggagaagacgcccgttccgatgtcagcaagcaggagtggtgactctggagattaga  
aagccctgccccttgacgggggcatctatgtctgcagggccaccaacttacagggcgaggcacggtgtgagtgccgct  
ggaggtgcgagtgccctcagtga-3'

## IL2RG

5'-

atgtgaagccatcattaccattcacatccctcttattcctgcagctgccctgctgggagtggggctgaacacgacaattctg  
acgccaatgggaatgaagacaccacagctgatttctctgaccactatgccactgactccctcagtgttccactctgcc  
cctcccagaggttcagtgtttgtttcaatgtcagtagatgaattgcaacttggaaacagcagctctgagccccagcctacca  
acctcactctgcattattggtacaagaactcggataatgataaagtccagaagtgcagccactatctattctctgaagaatca  
ctctggctgtcagttgcaaaaaaggagatccacctctaccaaacatttgttgcactccaggaccacgggaaccag  
gagacaggccacacagatgctaaaactgcagaatctggtgatcccctgggctccagagaacctaacacttcaaaactga  
gtgaatcccagctagaactgaactggaacaacagattctgaaccactgttggagcacttggtgcagtaccggactgactg  
ggaccacagctggactgaacaatcagtggtattatagacataagttctccttagctgtggatgggcagaaacgctacac  
gttctgttccggagccgcttaccactctgtggaagtgtcagcattggagtgaatggagccaccaatccactggggg  
agcaatactcaaaagagaatccttctgttgcattggaagccgtggttatctctgttggctccatgggattgattatcagcct  
tctctgtgtgtatttctggctggaacggacgatgccccgaatccaccctgaagaacctagaggatcttgttactgaatacca  
cgggaactttcggcctggagtggtgtgtctaagggactggctgagagtctgcagccagactacagtgaacgactctgcct  
cgctcagtgagattccccaaaaggagggcccttggggaggggctggggcctccccatgcaaccagcatagccccta  
ctgggccccccatgttacaccctaaagcctgaaacctga-3'
